# Supplementary material for: Tracking longitudinal genetic changes of circulating tumor DNA (ctDNA) in advanced Lung adenocarcinoma treated with chemotherapy
Source: PubMed Central journal article supplement (PMC6785899; doi:10.1186/s12967-019-2087-9), 2019-10-10

A

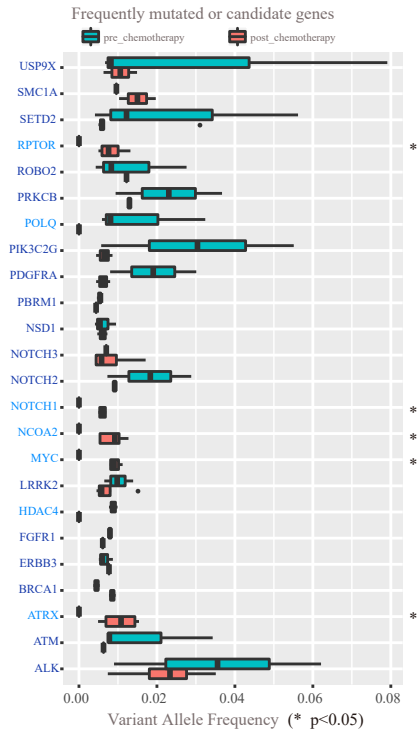

B

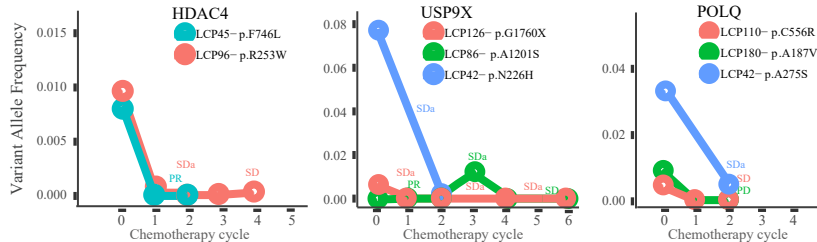

C

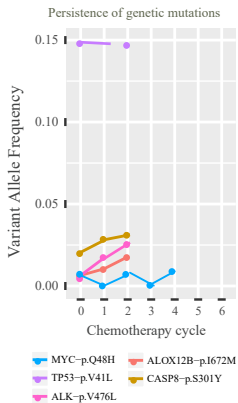

D

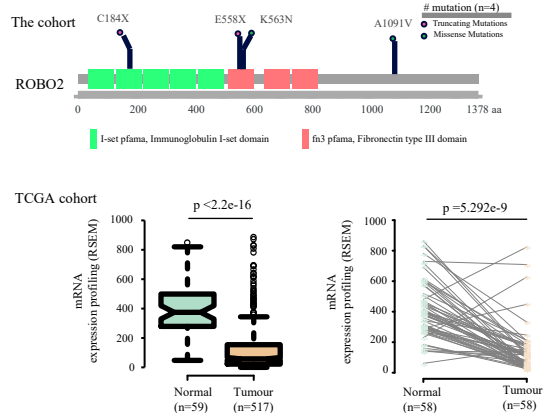

Supplement: 12967_2019_2087_MOESM7_ESM.pdf [file 12967_2019_2087_MOESM7_ESM.pdf]
