# Supplementary material for: Tracking longitudinal genetic changes of circulating tumor DNA (ctDNA) in advanced Lung adenocarcinoma treated with chemotherapy
Source: Springer Nature journal article supplement (doi:10.1186/s12967-019-2087-9), 2019-10-10

A

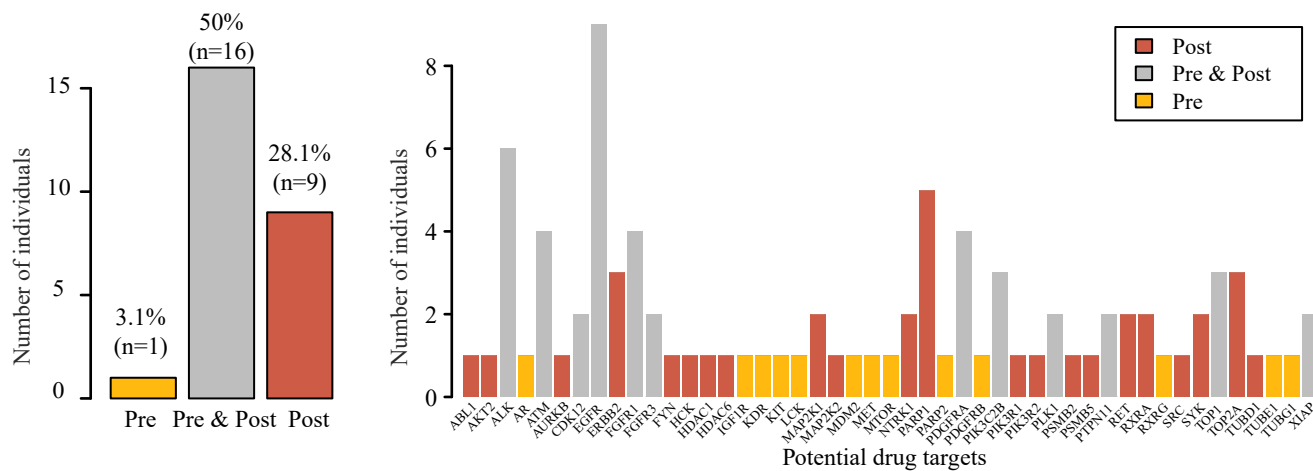

B

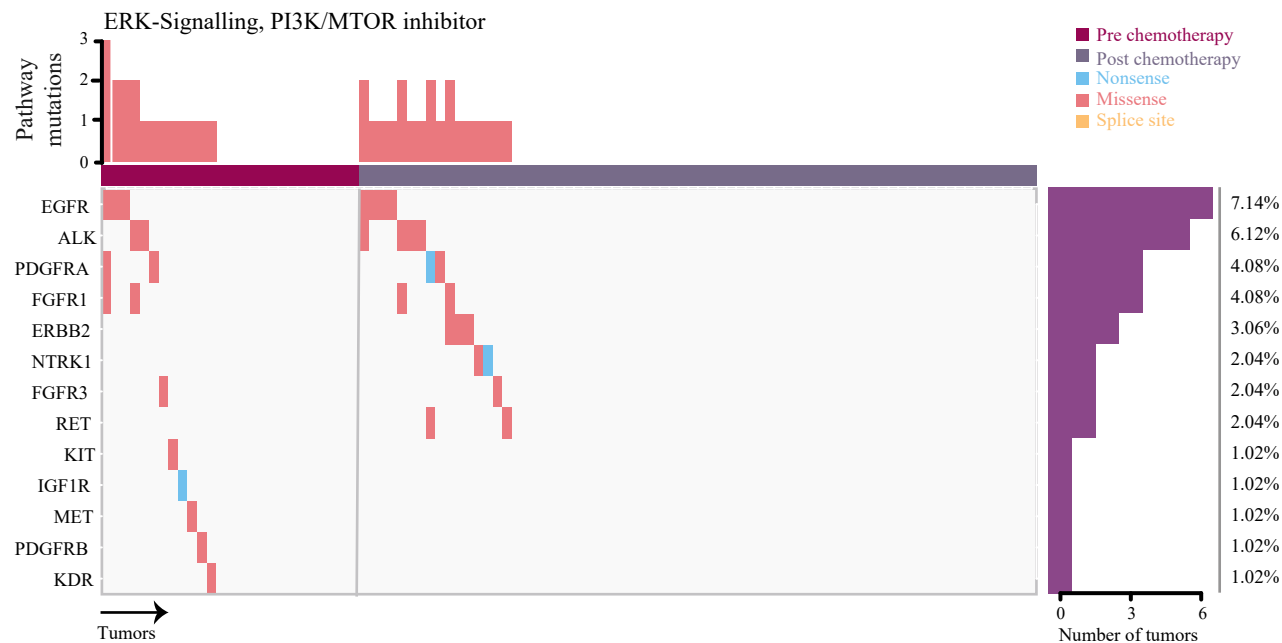

Supplement: MOESM9 [file 17260070]
