# Supplementary material for: Tracking longitudinal genetic changes of circulating tumor DNA (ctDNA) in advanced Lung adenocarcinoma treated with chemotherapy
Source: Springer Nature journal article supplement (doi:10.1186/s12967-019-2087-9), 2019-10-10
Supplement: MOESM10 [file 17260070]

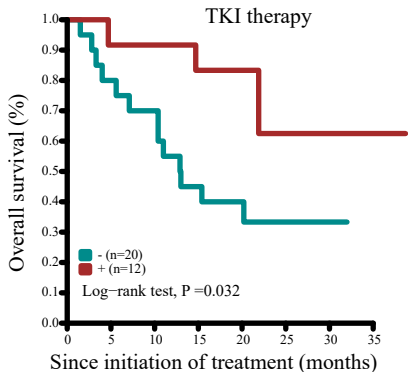

Univariate analysis

| Variable                                  | HR (95% CI)            | P-value |
|-------------------------------------------|------------------------|---------|
| Age                                       | 1.03 (0.972 ~ 1.09)    | 0.307   |
| Gender (male vs. female)                  | 0.651 (0.221 ~ 1.91)   | 0.436   |
| stage (III vs. IV)                        | 3.55 (0.794 ~ 15.9)    | 0.0973  |
| smoking_history (smoking vs. non-smoking) | 1.45 (0.516 ~ 4.1)     | 0.479   |
| pleural_effusion (yes vs. no)             | 1.55 (0.548 ~ 4.37)    | 0.41    |
| chemotherapy (carboplatin vs. cisplatin)  | 0.39 (0.138 ~ 1.1)     | 0.0755  |
| TKI (yes vs. no)                          | 0.259 (0.0728 ~ 0.924) | 0.0374  |

Hazard Ratio (95% CI)

Multivariate analysis

| Variable                                  | HR (95% CI)            | P-value |
|-------------------------------------------|------------------------|---------|
| Age                                       | 1.03 (0.95 ~ 1.12)     | 0.449   |
| Gender (male vs. female)                  | 0.466 (0.0309 ~ 7.04)  | 0.582   |
| stage (III vs. IV)                        | 5.37 (0.86 ~ 33.6)     | 0.0721  |
| smoking_history (smoking vs. non-smoking) | 1.01 (0.0644 ~ 15.7)   | 0.997   |
| pleural_effusion (yes vs. no)             | 2.11 (0.532 ~ 8.37)    | 0.289   |
| chemotherapy (carboplatin vs. cisplatin)  | 0.903 (0.222 ~ 3.67)   | 0.887   |
| TKI (yes vs. no)                          | 0.149 (0.0357 ~ 0.619) | 0.00881 |

Hazard Ratio (95% CI)
