# Supplementary material for: Tracking longitudinal genetic changes of circulating tumor DNA (ctDNA) in advanced Lung adenocarcinoma treated with chemotherapy
Source: J Transl Med. 2019 Oct 10;17:339. doi: 10.1186/s12967-019-2087-9 (PMC6785899; doi:10.1186/s12967-019-2087-9)
Supplement: Supplementary file 8 — Additional file 8: Table S5. Smoking associated signatures and platinum-based chemotherapy. [file 12967_2019_2087_MOESM8_ESM.xls]

## Sheet: Sheet1
Table S5 Smoking associated signatures and platinum-based chemotherapy
	Platinum sensitive	Platinum insensitive	p-value
Smoker with smoking associated signatures	6	5	0.3334
Nonsmoker with smoking associated signatures	5	1
Patient with smoking associated signatures	11	6	1
Patient without smoking associated signatures	5	3
